# Supplementary material for: Nitration of the Pollen Allergen Bet v 1.0101 Enhances the Presentation of Bet v 1-Derived Peptides by HLA-DR on Human Dendritic Cells
Source: PLoS One. 2012 Feb 14;7(2):e31483. doi: 10.1371/journal.pone.0031483 (PMC3279363; doi:10.1371/journal.pone.0031483)
Supplement: Table S2 — List of all identified Bet v 1-derived peptides. Listed are all identified Bet v 1-derived peptides in samples treated with unmodified Bet v 1 or Bet v 1 nitro for each donor. For samples treated with Bet v 1 nitro, copy numbers of peptides identified containing unmodified (Y) or nitrated tyrosine (Y*) are listed in separate columns. Peptide sequences are arranged according to the position of the first amino acid within the protein sequence. (XLS) [file pone.0031483.s002.xls]

## Sheet: all donors
Starting amino acid position	Donor number	B01			B02			B03			B04			B05			B06			B07			B08			B09			B10
	Cell treatment	Bet v 1a	Bet v 1a nitro		Bet v 1a	Bet v 1a nitro		Bet v 1a	Bet v 1a nitro		Bet v 1a	Bet v 1a nitro		Bet v 1a	Bet v 1a nitro		Bet v 1a	Bet v 1a nitro		Bet v 1a	Bet v 1a nitro		Bet v 1a	Bet v 1a nitro		Bet v 1a	Bet v 1a nitro		Bet v 1a	Bet v 1a nitro
	Copy numbers of peptides identified containing unmodified (Y) or nitrated tyrosine (Y*)	Y	Y	Y*	Y	Y	Y*	Y	Y	Y*	Y	Y	Y*	Y	Y	Y*	Y	Y	Y*	Y	Y	Y*	Y	Y	Y*	Y	Y	Y*	Y	Y	Y*
	Peptide Sequence
1	GVFNYETETTSVIPAARLFK															3			3
1	GVFNYETETTSVIPAARLFKAF											35	41		12	17			12						1
6	ETETTSVIPAARLFKAFILDGDNLFPKVAPQ																							3
6	ETETTSVIPAARLFKAFILDGDNLFPKVAPQA																	2						9
7	TETTSVIPAARLFKAFILDGDNLFPKVAPQA																							1
9	TTSVIPAARLFKAFILDGDNLFPKVAPQ																	1
9	TTSVIPAARLFKAFILDGDNLFPKVAPQA																							1
10	TSVIPAARLFKAFILDGDNLFPKVAPQ																	4						3
10	TSVIPAARLFKAFILDGDNLFPKVAPQA																	1
11	SVIPAARLFKAFILDGDNLFPKVAPQ														8			60			32			36
11	SVIPAARLFKAFILDGDNLFPKVAPQA														19			11			9			4
11	SVIPAARLFKAFILDGDNLFPKVAPQAI														4			5			16			22
12	VIPAARLFKAFILDG														2
12	VIPAARLFKAFILDGDN														10
12	VIPAARLFKAFILDGDNLFPKVAPQ																	7						7
13	IPAARLFKAFILDGDNLFPKVAPQ																	32						18
13	IPAARLFKAFILDGDNLFPKVAPQA																	2
16	ARLFKAFILDGDNLFPKVAPQ		14															8
16	ARLFKAFILDGDNLFPKVAPQA		7															1
16	ARLFKAFILDGDNLFPKVAPQAI		2
16	ARLFKAFILDGDNLFPKVAPQAIS		4
17	RLFKAFILDGDNLFPKVAPQ		5															1
17	RLFKAFILDGDNLFPKVAPQA																	4
17	RLFKAFILDGDNLFPKVAPQAI		2
18	LFKAFILDGDNLFP																	15
18	LFKAFILDGDNLFPK		2			2						37						30						20
18	LFKAFILDGDNLFPKV		2									12						33						35
18	LFKAFILDGDNLFPKVA		1									2						3						6
18	LFKAFILDGDNLFPKVAP		4									12						26						11
18	LFKAFILDGDNLFPKVAPQ		8									37					6	47						47
18	LFKAFILDGDNLFPKVAPQA		4									6					8	52						44
18	LFKAFILDGDNLFPKVAPQAI		3															17						10
18	LFKAFILDGDNLFPKVAPQAIS																	9
18	LFKAFILDGDNLFPKVAPQAISS																	14						8
18	LFKAFILDGDNLFPKVAPQAISSVEN																	7						1
19	FKAFILDGDNLFPK																	12						24
19	FKAFILDGDNLFPKV																	10
19	FKAFILDGDNLFPKVAPQ		4
19	FKAFILDGDNLFPKVAPQA		6
19	FKAFILDGDNLFPKVAPQAI		4
19	FKAFILDGDNLFPKVAPQAIS		1
19	FKAFILDGDNLFPKVAPQAISS		2
21	AFILDGDNLFPK											2						3
21	AFILDGDNLFPKV																	10
21	AFILDGDNLFPKVAPQ																	21
21	AFILDGDNLFPKVAPQA																	9
21	AFILDGDNLFPKVAPQAI																	2
23	ILDGDNLFPKVAPQ																	3
23	ILDGDNLFPKVAPQA														11
23	ILDGDNLFPKVAPQAI		2
23	ILDGDNLFPKVAPQAISSVENIEGNGGPGTIK																									2	15
23	ILDGDNLFPKVAPQAISSVENIEGNGGPGTIKK																										17
24	LDGDNLFPKVAPQAISSVENIEGNGGPGTIK																										17
24	LDGDNLFPKVAPQAISSVENIEGNGGPGTIKK																										8
25	DGDNLFPKVAPQAISSVENIEGNGGPG																										17
25	DGDNLFPKVAPQAISSVENIEGNGGPGTIK																										5
25	DGDNLFPKVAPQAISSVENIEGNGGPGTIKK																										15
32	KVAPQAISSVENIEGNGGPG																									1	10
33	VAPQAISSVENIEGNGGPG																										19
34	APQAISSVENIEGNGGPG																										11
37	AISSVENIEGNGGPG																									3	30
46	GNGGPGTIKKISFPEGFPFK																													9
48	GGPGTIKKISFPEGFPFK																													2
73	EVDHTNFKYNYSVIEGGPIG	1		1				8		7								11			1				2
74	VDHTNFKYNYSVIEGGPI							1
93	DTLEKISNEIKIVATPDGGSILK		1
95	LEKISNEIKIVATPDGGSILK																										1
96	EKISNEIKIVATPDGGSIL																										1
97	KISNEIKIVATPDGGSIL																										9
98	ISNEIKIVATPDG																										13
98	ISNEIKIVATPDGGSI																										19
98	ISNEIKIVATPDGGSIL																										9
98	ISNEIKIVATPDGGSILK																										9
98	ISNEIKIVATPDGGSILKISNKYHTKGDHE																		1
102	IKIVATPDGGSILKISNKYHTKGDHE																	6	12					4	1		7	1
102	IKIVATPDGGSILKISNKYHTKGDHEV																	3						1
102	IKIVATPDGGSILKISNKYHTKGDHEVK																	5	4
102	IKIVATPDGGSILKISNKYHTKGDHEVKA																	7	13					8			1	1
102	IKIVATPDGGSILKISNKYHTKGDHEVKAEQ																3	69	68				1	106	60		55	61
104	IVATPDGGSILKISNKYHTKGDHEVKAEQ																							6	2		2
106	ATPDGGSILKISNKYHTKGDHE																	2
107	TPDGGSILKISNKYHTK		1
107	TPDGGSILKISNKYHTKG																		2
107	TPDGGSILKISNKYHTKGDH																		13
107	TPDGGSILKISNKYHTKGDHE		1	3													1	28	30					25	13			15		1
107	TPDGGSILKISNKYHTKGDHEVK																	1	16					19	6		6	16
107	TPDGGSILKISNKYHTKGDHEVKA																											3
107	TPDGGSILKISNKYHTKGDHEVKAEQ																	9	9		1			18	13		17	16
110	GGSILKISNKYHTKGDHE																	17	8
130	AEQVKASKEMGETLLRAVESYLLAHSDA														11	2
133	VKASKEMGETLLR												3		45
133	VKASKEMGETLLRAVESYLLA														1
133	VKASKEMGETLLRAVESYLLAHS																				10
133	VKASKEMGETLLRAVESYLLAHSD														2						23
133	VKASKEMGETLLRAVESYLLAHSDA									2				85	132	92				29	174	102								12
133	VKASKEMGETLLRAVESYLLAHSDAY																				14
133	VKASKEMGETLLRAVESYLLAHSDAYN													16		287				27	95	366						2		40
134	KASKEMGETLLRAVESYLLAHSDA																				28	3
134	KASKEMGETLLRAVESYLLAHSDAYN																				8
135	ASKEMGETLLR														1
135	ASKEMGETLLRAVESYLLAHSD														2
135	ASKEMGETLLRAVESYLLAHSDA										46			42	124	48				15	74	12
135	ASKEMGETLLRAVESYLLAHSDAYN														3						4
136	SKEMGETLLRAVESYLLAHSDA																				1
137	KEMGETLLRAVESYLLAHS														11
137	KEMGETLLRAVESYLLAHSD										1					1
137	KEMGETLLRAVESYLLAHSDA													34	79	35					33
138	EMGETLLRAVESYLLAHS												18
138	EMGETLLRAVESYLLAHSD											1	13		5
138	EMGETLLRAVESYLLAHSDA										5	35	25		20						10
139	MGETLLRAVESYLLAHS												2
139	MGETLLRAVESYLLAHSD												6
139	MGETLLRAVESYLLAHSDA												2
140	GETLLRAVESYLLAH										3	15	11		11	7
140	GETLLRAVESYLLAHS								1		8	31	21	1	42	14					1									22
140	GETLLRAVESYLLAHSD										11	41	28	17	36	29					42
140	GETLLRAVESYLLAHSDA										23	28	22	19	50	28				4	14
141	ETLLRAVESYLLAH												2
141	ETLLRAVESYLLAHS								2			7			9
141	ETLLRAVESYLLAHSD											3	4			2
141	ETLLRAVESYLLAHSDA										9	20	17		17
146	AVESYLLAHSDA														8	2
